# Supplementary material for: Differential Patterns of Delayed Emotion Circuit Maturation in Abused Girls With and Without Internalizing Psychopathology
Source: Atypon-hosted journal article supplement (doi:10.1176/appi.ajp.2021.20081192), 2021-08-19
Supplement: appi.ajp.2021.20081192.ds001.pdf [file appi.ajp.2021.20081192.ds001.pdf]

## SUPPLEMENTAL METHODS

### *Participant Recruitment and Assessment*

Across all sites, participants underwent a comprehensive clinical battery to assess current internalizing psychopathology and maltreatment history. Diagnoses were made according to DSM-IV criteria using the Kiddie Schedule for Affective Disorders and Schizophrenia (KSADS)(1). All study sites excluded participants with substance dependency or abuse, an unstable medical condition, current use of psychotropic medication, MRI contraindication, or pregnancy. Binary illness assignment (no diagnoses vs. at least one diagnosis) was defined as a current diagnosis of major depressive disorder (MDD), generalized anxiety disorder (GAD), separation anxiety disorder (SAD), or PTSD. Girls meeting diagnostic criteria for past or present psychotic, bipolar, or obsessive-compulsive disorders were excluded from the individual studies outright. Subsets of girls completed the following symptom severity assessments: the Mood and Feelings Questionnaire(2) (MFQ; n=169; Madison, WI cohort completed full version; Little Rock, AK cohorts completed short version; Seattle, WA cohort did not complete) assessing depression symptoms, the Screen for Child Anxiety Related Emotional Disorders(3) (SCARED; n=122; Little Rock, AK cohorts did not complete) assessing anxiety symptoms, and the UCLA PTSD Reaction Index(4) (PTSD-RI; n=134) assessing post-traumatic stress disorder (PTSD) symptoms.

Childhood abuse and neglect were assessed using the Childhood Trauma Questionnaire (CTQ)(5). Abuse severity was measured with the sum of the CTQ abuse subscales. Binary abuse assignment (non-exposed vs. exposed) was defined based on previous validation(6): any subscale greater than 'None' (physical abuse total>7, sexual abuse total>5, and emotional abuse total>8) indicated abuse exposure. Neglect severity was measured with the CTQ physical neglect subscale. Girls were labeled as *Resilient* if they had a history of abuse and no internalizing diagnoses, while girls with abuse exposure and at least one internalizing diagnosis were labeled as *Susceptible*. Finally, girls from the Madison, WI and Seattle, WA cohorts completed the Weschler Abbreviated Scale of Intelligence-II(7) and the Little Rock, AR cohort

completed the Expressive One-Word Picture Vocabulary Test(8), each to assess IQ .The girls from Madison and Seattle also completed the Tanner Stage self-report of pubertal development(9).

### *Image Acquisition and Individual Preprocessing*

Image preprocessing of T1-weighted MRI scans and whole-brain voxel-based morphometry (VBM) was conducted using the Computational Anatomy Toolbox (CAT12; <http://dbm.neuro.uni-jena.de/cat/>) within Statistical Parametric Mapping software (SPM12; Wellcome Department of Imaging Neuroscience, London, United Kingdom) running on MATLAB 8.3 (Mathworks, Natick, MA, USA). All recommended default parameters within the CAT12 manual were used. The T1-weighted images were first spatially normalized to Montreal Neurological Institute (MNI) template space using the DARTEL algorithm. Next, the images were segmented into gray matter (GM), white matter (WM), and cerebrospinal fluid (CSF) using SPM12 tissue probability maps. A final quality check of the covariance structure of all gray matter images ensured homogeneity. The final voxel resolution was 1 x 1 x 1 mm.

Mean voxel-wise cortical and subcortical GMV estimates were extracted using parcellations from the Brainnetome Atlas(10), while cerebellar regions were extracted from the updated automatic anatomical labeling atlas (AAL2)(11). Both atlases were converted to MNI space for spatial consistency. For the whole-brain analyses, all regions-of-interest (ROIs) were included, yielding a total of 272 ROIs. For the emotion and language circuitry analyses, maps of voxels forming emotion and language circuitry were created in Neurosynth ([www.neurosynth.org](http://www.neurosynth.org))(12) with the search terms “emotion” and “language” respectively (top panel of Supplemental Figure S1). Erring on the side of ROI inclusion, the uniformity test was used, and an ROI was included if it showed at least 25% spatial overlap with the Neurosynth mask (bottom panel of Supplemental Figure S1). This yielded a total of 152 and 141 ROIs for emotion and language circuits respectively. These ROI masks had considerable overlap: emotion ROIs showed 77.0% voxel overlap with the language ROIs and the language ROIs showed 77.6% overlap with the emotion ROIs. The specific regions used in each parcellation are listed in Supplemental Table S2. The remaining preprocessing steps were completed in R(13), where each GMV estimate was scaled to total intracranial

volume (TIV). Finally, site-pooled data were harmonized across MR scanners through batch effects correction in *ComBat* (*sva* package)(14), which effectively removed scanner-related differences in GMV ROIs (Supplemental Figure S2). Importantly, abuse and diagnosis assignment, as well as chronological age, were included in the *ComBat* design matrix to ensure variance-of-interest was not removed.

### *Model Building and Training*

Stacked generalization is a form of ensemble machine learning whereby individual, “lower-level” learning algorithms are aggregated to increase predictive power by utilizing the strengths of each base model (referred to as *submodels*). For example, ridge regression models are powerful in linear contexts, generalize well even with smaller sample sizes, but tend to underfit the data because the model cannot detect interactive, non-linear complexities between predictors. Multi-layer perceptron models (artificial neural networks), on the other hand, are ideal for detecting highly-interactive relationships between predictors and make no linear assumptions, however tend to overfit the data, especially when trained with small samples. A “super learner”, therefore, is a final prediction aggregation model with the objective of finding the optimal combination of submodel predictions, theoretically accounting for these strengths and weaknesses.

First, a set of machine learning regression submodels underwent hyperparameter tuning using 10-fold cross-validation on the training set (remaining instances after pseudorandom assignment to the validation set;  $n = 74$ ). Next, the super learner’s hyperparameters were optimized using submodel held-out predictions during 10-fold cross-validation. Here, the hold-outs were used as “second-order” features (one prediction per submodel, per instance). Then, the optimized super learner and all submodels were trained with the full hold-out set. Once all models were optimized and trained, the super learner was evaluated on the validation set ( $n = 24$ ) as further described below.

Five machine learning algorithms were used as submodels for the prediction of chronological age in TD girls. Submodels’ hyperparameters were tuned with 10-fold cross-validation. As many GMV estimates were related, it was important that each submodel algorithm be robust to correlated features. These

algorithms included ridge regression (RR)(15) trained with stochastic gradient descent, support vector machine (SVM) regression(16), multilayer perceptron (MLP)(17), random forest (RF) regression(18), and gradient boosting machine (boosted trees; GBM) regression(19). Super learner coefficients were optimized using an additional RR model (also trained with stochastic gradient descent) excluding an intercept term. All algorithms were implemented in Python (v 3.7.0) using *SciKit-Learn* (20).

### *Hyperparameter Tuning*

Each submodel contained hyperparameters (*a priori* settings/options for particular algorithms) that needed to be specified upon creation. In order to maximize predictive value of each model, a randomized hyperparameter search using 10-fold cross validation was implemented in *SciKit-Learn*. A probability distribution of possible parameter values was chosen *a priori* for each hyperparameter. Random values were drawn from Gaussian distributions (generated with *SciPy*(21)) centered at the recommended value for that parameter, as provided by *SciKit-Learn's* documentation. If nominal options were given for a parameter, random uniform distributions were used. The search space for each model, as well as their corresponding *SciKit-Learn* functions, are listed in Supplemental Table S3. In the special case of the multilayer perceptron, network architecture was decided *a priori*: a single hidden layer was used containing roughly half the training sample size (40) neurons. Each neuron had a unique bias term and a rectified linear unit (ReLU) activation function. The output layer contained no activation function. Optimized, fully-trained submodels and their super learner coefficients were saved using the Python-based *Joblib* (v. 0.13.2) for subsequent analyses.

### *Label/Age Bias Correction in Group-Level BrainAGE Analyses*

The BrainAGE is a highly non-linear residual, describing the n-dimensional “distance” between the true chronological age and the super learner’s prediction. However, as displayed in Supplemental Figure S4, super learner predictions have an “age bias”, where the model systemically *over*-estimates BrainAGE for younger girls and *under*-estimates BrainAGE for older girls. Unfortunately, this is extremely common across studies incorporating normative development models, especially those using the BrainAGE

index and likely represents a statistical “regression-to-the-mean” effect (although explaining this bias more rigorously, as well as methods to correct it, are active areas of research). In order to use the BrainAGE as intended, the index should represent the degree of deviation from normative development independent of the true chronological age of the brain being analyzed. For this reason we covary for label (chronological age) in all group-level analyses, ensuring that abuse- and internalizing-related differences in BrainAGE were not attributable to there being younger (or older) girls in one group relative to another.

### *BrainAGE Group-Level Analyses*

Linear mixed-effects models in R (*lme4* package), were used to determine abuse- and diagnosis-related differences in BrainAGE from whole-brain, emotion, and language circuit features. For abuse, we used both binary and continuous approaches to test two related, but distinct questions: first, does having been abused induce advanced maturation in girl’s emotion circuitry (binary)? And second, is there a relationship between the amount of abuse a girl has experienced and altered maturation of emotion circuitry (continuous)? To test the first question, we used the binary abuse exposure assignment to explain BrainAGE, but importantly, covaried for abuse load. To test the second question, we used the continuous total CTQ abuse measure to explain BrainAGE, both across all girls (typically-developing + resilient + susceptible) and within only abused girls. Because physical neglect scores did not vary considerably across the sample, binarization was not possible due to extreme class imbalance (no exposure >> exposure). Therefore, only continuous physical neglect was used. Covariates for all analyses included chronological age (to account for super learner label bias), IQ, scanner, and physical neglect experiences.

### *Post-Hoc Analyses: Symptom Severity Relationships with BrainAGE*

BrainAGE relationships with internalizing symptom severity were analyzed to investigate whether significant abuse- or diagnosis-related BrainAGEs may be associated with psychiatric symptoms. An LME model including PTSD, depression, and anxiety symptom totals, as well as the group-level covariates (chronological age, scanner, IQ, physical neglect) was implemented. Abuse severity was also included as a

covariate in these models to ensure symptom-related effects could not be explained by more or less abuse exposure. Because these symptom scores were not collected in all girls (missing not-at-random), analyses were run in girls where data was available. Additionally, a model including subdimensions of DSM-IV PTSD symptoms (re-experiencing, avoidance, hyperarousal) was also tested.

#### *Post-Hoc Analyses: Puberty Relationships with BrainAGE*

BrainAGE relationships with pubertal status was analyzed to investigate whether significant abuse- or diagnosis-related BrainAGEs may be related to developmental milestones. More specifically, an LME model including Tanner Stage pubertal score, its interactions with abuse-exposure and diagnosis, and the group-level covariates (label, scanner, IQ, physical neglect) as predictors was implemented. Because Tanner Stage was only collected in a subset of girls (Madison, WI and Seattle, WA cohorts), it was assessed in girls where data was available.

#### *Calculating Regional Influence on BrainAGE*

Briefly, for each ROI, 1000 random bootstrap samples of that feature were created from each abuse group (Resilient, Susceptible). For each abuse-related bootstrap, the new feature vector replaced the TD feature vector for only that region, leaving all other TD feature vectors intact. Chronological age was predicted and BrainAGE was re-calculated. Finally, median BrainAGE (across bootstraps) was calculated for each girl, yielding a perturbed BrainAGE distribution for that region. Paired-samples Wilcoxon tests compared the abuse-perturbed BrainAGE distribution to the true BrainAGE distribution. In order to ensure that the abuse-perturbed BrainAGEs indeed changed beyond chance expectations (i.e. the feature was informative for age prediction generally, regardless of phenotype), an additional comparison was made with a TD-perturbed bootstrap for that feature (similar to how the null distribution of model performances was calculated earlier). As hundreds of regions were being tested univariately, a false discovery rate (FDR; implemented in SciPy) correction was applied across Wilcoxon p -values. If the abuse-perturbed BrainAGE distribution was significantly different than both the true BrainAGE distribution and TD-perturbed BrainAGE distribution for that ROI (FDR-corrected  $p < 0.05$ ), then that abuse-related ROI was considered

significantly influential. Finally, if a region was found to be influential, the adjusted effect size (adj.  $R^2$ ) was calculated and ROIs were segregated based on whether they increased or decreased median BrainAGE.

## SUPPLEMENTAL REFERENCES

1. Kaufman J, Birmaher B, Brent D, Rao U, Flynn C, Moreci P, et al. Schedule for Affective Disorders and Schizophrenia for School-Age Children-Present and Lifetime Version (K-SADS-PL): initial reliability and validity data. *J Am Acad Child Adolesc Psychiatry*. 1997 Jul;36(7):980-8.
2. Costello EJ, Angold A. Scales to assess child and adolescent depression: checklists, screens, and nets. *J Am Acad Child Adolesc Psychiatry*. 1988 Nov;27(6):726-37.
3. Birmaher B, Khetarpal S, Brent D, Cully M, Balach L, Kaufman J, et al. The Screen for Child Anxiety Related Emotional Disorders (SCARED): scale construction and psychometric characteristics. *J Am Acad Child Adolesc Psychiatry*. 1997 Apr;36(4):545-53.
4. Steinberg AM, Brymer MJ, Decker KB, Pynoos RS. The University of California at Los Angeles Post-traumatic Stress Disorder Reaction Index. *Curr Psychiatry Rep*. 2004 Apr;6(2):96-100.
5. Bernstein DP, Fink L, Handelsman L, Foote J, Lovejoy M, Wenzel K, et al. Initial reliability and validity of a new retrospective measure of child abuse and neglect. *Am J Psychiatry*. 1994 Aug;151(8):1132-6.
6. Bernstein DP, Ahluvalia T, Pogge D, Handelsman L. Validity of the Childhood Trauma Questionnaire in an Adolescent Psychiatric Population. *J Am Acad Child Adolesc Psychiatry*. 1997 Mar 1;36(3):340-8.
7. Wechsler D. Wechsler Abbreviated Scale of Intelligence-Second Edition Manual. Bloomington, MN: Pearson; 2011.
8. Gardner MF, Academic Therapy Publications, Pro-Ed (Firm), Expressive one-word picture vocabulary test. EOWPVT-R: expressive one-word picture vocabulary test, revised. Novato, Calif.; [Austin, Tex.: Academic Therapy Publications ; [Distributed by Pro-Ed; 1990.
9. Morris NM, Udry JR. Validation of a self-administered instrument to assess stage of adolescent development. *J Youth Adolesc*. 1980 Jun 1;9(3):271-80.
10. Fan L, Li H, Zhuo J, Zhang Y, Wang J, Chen L, et al. The Human Brainnetome Atlas: A New Brain Atlas Based on Connectional Architecture. *Cereb Cortex*. 2016 Aug 1;26(8):3508-26.
11. Rolls ET, Joliot M, Tzourio-Mazoyer N. Implementation of a new parcellation of the orbitofrontal cortex in the automated anatomical labeling atlas. *NeuroImage*. 2015 Nov 15;122:1-5.
12. Yarkoni T, Poldrack RA, Nichols TE, Van Essen DC, Wager TD. Large-scale automated synthesis of human functional neuroimaging data. *Nat Methods*. 2011 Jun 26;8(8):665-70.
13. R Core Team. R: A Language and Environment for Statistical Computing [Internet]. Vienna, Austria: R Foundation for Statistical Computing; 2016. Available from: <https://www.R-project.org>
14. Fortin J-P, Cullen N, Sheline YI, Taylor WD, Aselcioglu I, Cook PA, et al. Harmonization of cortical thickness measurements across scanners and sites. *NeuroImage*. 2018 Feb 15;167:104-20.
15. Hoerl AE, Kennard RW. Ridge Regression: Biased Estimation for Nonorthogonal Problems. *Technometrics*. 1970;12(1):55-67.



16. Boser BE, Guyon IM, Vapnik VN. A Training Algorithm for Optimal Margin Classifiers. In: Proceedings of the 5th Annual ACM Workshop on Computational Learning Theory. ACM Press; 1992. p. 144–152.
17. Rumelhart DE, Hinton GE, Williams RJ. Learning Internal Representations by Error Propagation [Internet]. CALIFORNIA UNIV SAN DIEGO LA JOLLA INST FOR COGNITIVE SCIENCE; 1985 Sep [cited 2019 Oct 30]. Report No.: ICS-8506. Available from: <https://apps.dtic.mil/docs/citations/ADA164453>
18. Ho TK. Random Decision Forests. In: Proceedings of the Third International Conference on Document Analysis and Recognition (Volume 1) - Volume 1 [Internet]. Washington, DC, USA: IEEE Computer Society; 1995 [cited 2018 Oct 31]. p. 278–. (ICDAR '95). Available from: <http://dl.acm.org/citation.cfm?id=844379.844681>
19. Friedman JH. Greedy Function Approximation: A Gradient Boosting Machine. *Ann Stat*. 2001;29(5):1189–232.
20. Pedregosa F, Varoquaux G, Gramfort A, Michel V, Thirion B, Grisel O, et al. Scikit-learn: Machine Learning in Python. *J Mach Learn Res*. 2011;12(Oct):2825–30.
21. Virtanen P, Gommers R, Oliphant TE, Haberland M, Reddy T, Cournapeau D, et al. SciPy 1.0- Fundamental Algorithms for Scientific Computing in Python. *ArXiv*. 2019;abs/1907.10121.

**SUPPLEMENTAL TABLES**

**Supplemental Table S1.** Demographic, maltreatment, and clinical variables, as well as scanning parameters, for participants within each study site/cohort. Values, unless otherwise specified, indicate means with standard deviations in parentheses. Ranges are in brackets. TD = typically-developing; CTQ = Childhood Trauma Questionnaire; PTSD = post-traumatic stress disorder; MFQ = Mood and Feelings Questionnaire; SCARED = Screen for Child Anxiety Related Emotional Disorders; PTSD-RI = PTSD Reaction Index  
 \* Indicates a variable that was not consistently available for all subjects. Statistics are provided for data that were available

| Study Site                                 | University of Wisconsin          |                                   |                                  | University of Arkansas            |                                   |                                   | University of Washington         |                                  |                                  |
|--------------------------------------------|----------------------------------|-----------------------------------|----------------------------------|-----------------------------------|-----------------------------------|-----------------------------------|----------------------------------|----------------------------------|----------------------------------|
|                                            | TD                               | Resilient                         | Susceptible                      | TD                                | Resilient                         | Susceptible                       | TD                               | Resilient                        | Susceptible                      |
| <b>Demographic Variables</b>               |                                  |                                   |                                  |                                   |                                   |                                   |                                  |                                  |                                  |
| n                                          | 22                               | 5                                 | 19                               | 41                                | 30                                | 48                                | 36                               | 15                               | 18                               |
| Age                                        | 14.63<br>(2.98)<br>[9.63, 18.60] | 14.73<br>(2.28)<br>[12.36, 17.51] | 14.70<br>(3.23)<br>[8.07, 18.80] | 14.32<br>(2.11)<br>[11.00, 18.00] | 14.77<br>(1.68)<br>[11.00, 17.00] | 14.77<br>(1.73)<br>[11.00, 17.00] | 12.63<br>(2.64)<br>[8.53, 16.97] | 12.73<br>(2.71)<br>[8.53, 16.85] | 13.82<br>(2.58)<br>[8.45, 16.78] |
| IQ                                         | 110.77<br>(12.16)                | 105.80<br>(3.03)                  | 96.39<br>(10.01)                 | 114.07<br>(19.31)                 | 99.87<br>(16.27)                  | 95.81<br>(16.33)                  | 109.50<br>(16.01)                | 118.40<br>(14.87)                | 110.61<br>(13.40)                |
| Tanner Stage                               |                                  |                                   |                                  | -                                 | -                                 | -                                 |                                  |                                  |                                  |
| <b>Maltreatment and Clinical Variables</b> |                                  |                                   |                                  |                                   |                                   |                                   |                                  |                                  |                                  |
| CTQ Abuse                                  | 15.91<br>(1.11)<br>[15, 18]      | 21.6<br>(1.82)<br>[20, 24]        | 39.74<br>(13.37)<br>[19, 70]     | 15.87<br>(1.08)<br>[15, 19]       | 26.77<br>(9.94)<br>[18, 57]       | 32.19<br>(11.89)<br>[19, 75]      | 16.03<br>(1.11)<br>[15, 18]      | 25.67<br>(5.60)<br>[18, 37]      | 32.22<br>(11.26)<br>[19, 64]     |
| CTQ Physical Neglect                       | 5.36<br>(0.66)<br>[5, 7]         | 6.80<br>(1.48)<br>[5, 9]          | 10.42<br>(3.93)<br>[5, 22]       | 8.66<br>(3.99)<br>[5, 14]         | 8.73<br>(3.60)<br>[5, 17]         | 9.06<br>(4.18)<br>[5, 23]         | 5.44<br>(0.94)<br>[5, 9]         | 9.47<br>(3.91)<br>[5, 18]        | 10.61<br>(5.49)<br>[5, 23]       |
| Anxiety Disorder (n)                       | -                                | -                                 | 8                                | -                                 | -                                 | 23                                | -                                | -                                | 7                                |
| Depressive Disorder (n)                    | -                                | -                                 | 18                               | -                                 | -                                 | 36                                | -                                | -                                | 7                                |
| PTSD (n)                                   | -                                | -                                 | 19                               | -                                 | -                                 | 32                                | -                                | -                                | 5                                |
| MFQ*                                       | -                                | 4.20<br>(1.60)                    | 28.21<br>(9.81)                  | -                                 | 4.67<br>(4.71)                    | 12.58<br>(6.95)                   | -                                | -                                | -                                |
| SCARED*                                    | -                                | 9.50<br>(3.92)                    | 38.47<br>(14.68)                 | -                                 | -                                 | -                                 | -                                | 23.27<br>(11.14)                 | 26.89<br>(16.68)                 |
| PTSD-RI*                                   | -                                | -                                 | 58.61<br>(10.82)                 | -                                 | 18.11<br>(15.10)                  | 40.73<br>(16.70)                  | -                                | 26.13<br>(15.64)                 | 28.00<br>(12.31)                 |
| <b>Scan Parameters</b>                     |                                  |                                   |                                  |                                   |                                   |                                   |                                  |                                  |                                  |
| Tesla                                      | 3T                               |                                   |                                  | 3T                                |                                   |                                   | 3T                               |                                  |                                  |
| Head-Coil                                  | 8-Channel                        |                                   |                                  | 32-Channel                        |                                   |                                   | 32-Channel                       |                                  |                                  |
| TE                                         | 3.20ms                           |                                   |                                  | 3.02ms, 3.70ms                    |                                   |                                   | 3.5                              |                                  |                                  |
| TR                                         | 8.20ms                           |                                   |                                  | 2.60ms, 7.50ms                    |                                   |                                   | 2.53ms                           |                                  |                                  |

**Supplemental Table S2.** Regions from the Brainnetome and Automated Anatomical Labelling 2 atlases included in emotion and language circuitry parcellations.

| Circuit   | Atlas Region ID | Hemisphere | Lobe                   | Gyrus                                | Description             |
|-----------|-----------------|------------|------------------------|--------------------------------------|-------------------------|
| Emotion   | Amyg_L_2_1      | L          | Subcortical Nuclei     | Amygdala                             | Medial Amygdala         |
|           | Amyg_L_2_2      | L          | Subcortical Nuclei     | Amygdala                             | Lateral Amygdala        |
|           | Amyg_R_2_1      | R          | Subcortical Nuclei     | Amygdala                             | Medial Amygdala         |
|           | Amyg_R_2_2      | R          | Subcortical Nuclei     | Amygdala                             | Lateral Amygdala        |
|           | BG_L_6_1        | L          | Subcortical Nuclei     | Basal Ganglia                        | Ventral Caudate         |
|           | BG_L_6_2        | L          | Subcortical Nuclei     | Basal Ganglia                        | Globus Pallidus         |
|           | BG_L_6_3        | L          | Subcortical Nuclei     | Basal Ganglia                        | Nucleus Accumbens       |
|           | BG_L_6_4        | L          | Subcortical Nuclei     | Basal Ganglia                        | Ventromedial Putamen    |
|           | BG_L_6_5        | L          | Subcortical Nuclei     | Basal Ganglia                        | Dorsal Caudate          |
|           | BG_L_6_6        | L          | Subcortical Nuclei     | Basal Ganglia                        | Dorsolateral Putamen    |
|           | BG_R_6_1        | R          | Subcortical Nuclei     | Basal Ganglia                        | Ventral Caudate         |
|           | BG_R_6_2        | R          | Subcortical Nuclei     | Basal Ganglia                        | Globus Pallidus         |
|           | BG_R_6_3        | R          | Subcortical Nuclei     | Basal Ganglia                        | Nucleus Accumbens       |
|           | BG_R_6_4        | R          | Subcortical Nuclei     | Basal Ganglia                        | Ventromedial Putamen    |
|           | BG_R_6_5        | R          | Subcortical Nuclei     | Basal Ganglia                        | Dorsal Caudate          |
|           | BG_R_6_6        | R          | Subcortical Nuclei     | Basal Ganglia                        | Dorsolateral Putamen    |
|           | CG_L_7_1        | L          | Cingulate              | Cingulate Gyrus                      | Dorsal Area 23          |
|           | CG_L_7_2        | L          | Cingulate              | Cingulate Gyrus                      | Rostroventral Area 24   |
|           | CG_L_7_3        | L          | Cingulate              | Cingulate Gyrus                      | Pregenual Area 32       |
|           | CG_L_7_4        | L          | Cingulate              | Cingulate Gyrus                      | Ventral Area 23         |
|           | CG_L_7_5        | L          | Cingulate              | Cingulate Gyrus                      | Caudodorsal Area 24     |
|           | CG_L_7_7        | L          | Cingulate              | Cingulate Gyrus                      | Subgenual Area 32       |
|           | CG_R_7_1        | R          | Cingulate              | Cingulate Gyrus                      | Dorsal Area 23          |
|           | CG_R_7_2        | R          | Cingulate              | Cingulate Gyrus                      | Rostroventral Area 24   |
|           | CG_R_7_3        | R          | Cingulate              | Cingulate Gyrus                      | Pregenual Area 32       |
|           | CG_R_7_5        | R          | Cingulate              | Cingulate Gyrus                      | Caudodorsal Area 24     |
|           | CG_R_7_7        | R          | Cingulate              | Cingulate Gyrus                      | Subgenual Area 32       |
|           | FuG_L_3_2       | L          | Temporal               | Fusiform Gyrus                       | Medioventral Area37     |
|           | FuG_L_3_3       | L          | Temporal               | Fusiform Gyrus                       | Lateroventral Area37    |
|           | FuG_R_3_2       | R          | Temporal               | Fusiform Gyrus                       | Medioventral Area37     |
|           | FuG_R_3_3       | R          | Temporal               | Fusiform Gyrus                       | Lateroventral Area37    |
|           | Hipp_L_2_1      | L          | Subcortical Nuclei     | Hippocampus                          | Rostral Hippocampus     |
|           | Hipp_L_2_2      | L          | Subcortical Nuclei     | Hippocampus                          | Caudal Hippocampus      |
|           | Hipp_R_2_1      | R          | Subcortical Nuclei     | Hippocampus                          | Rostral Hippocampus     |
|           | Hipp_R_2_2      | R          | Subcortical Nuclei     | Hippocampus                          | Caudal Hippocampus      |
|           | IFG_L_6_1       | L          | Frontal                | Inferior Frontal Gyrus               | Dorsal Area 44          |
|           | IFG_L_6_2       | L          | Frontal                | Inferior Frontal Gyrus               | Inferior Frontal Sulcus |
|           | IFG_L_6_3       | L          | Frontal                | Inferior Frontal Gyrus               | Caudal Area 45          |
|           | IFG_L_6_4       | L          | Frontal                | Inferior Frontal Gyrus               | Rostral Area 45         |
|           | IFG_L_6_5       | L          | Frontal                | Inferior Frontal Gyrus               | Opercular Area 44       |
| IFG_L_6_6 | L               | Frontal    | Inferior Frontal Gyrus | Ventral Area 44                      |                         |
| IFG_R_6_1 | R               | Frontal    | Inferior Frontal Gyrus | Dorsal Area 44                       |                         |
| IFG_R_6_2 | R               | Frontal    | Inferior Frontal Gyrus | Inferior Frontal Sulcus              |                         |
| IFG_R_6_3 | R               | Frontal    | Inferior Frontal Gyrus | Caudal Area 45                       |                         |
| IFG_R_6_4 | R               | Frontal    | Inferior Frontal Gyrus | Rostral Area 45                      |                         |
| IFG_R_6_5 | R               | Frontal    | Inferior Frontal Gyrus | Opercular Area 44                    |                         |
| IFG_R_6_6 | R               | Frontal    | Inferior Frontal Gyrus | Ventral Area 44                      |                         |
| INS_L_6_1 | L               | Insula     | Insular Gyrus          | Hypergranular Insula                 |                         |
| INS_L_6_2 | L               | Insula     | Insular Gyrus          | Ventral Agranular Insula             |                         |
| INS_L_6_3 | L               | Insula     | Insular Gyrus          | Dorsal Agranular Insula              |                         |
| INS_L_6_4 | L               | Insula     | Insular Gyrus          | Ventral Dysgranular, Granular Insula |                         |
| INS_L_6_5 | L               | Insula     | Insular Gyrus          | Dorsal Granular Insula               |                         |
| INS_L_6_6 | L               | Insula     | Insular Gyrus          | Dorsal Dysgranular Insula            |                         |
| INS_R_6_1 | R               | Insula     | Insular Gyrus          | Hypergranular Insula                 |                         |

|            |   |           |                          |                                          |
|------------|---|-----------|--------------------------|------------------------------------------|
| INS_R_6_2  | R | Insula    | Insular Gyrus            | Ventral Agranular Insula                 |
| INS_R_6_3  | R | Insula    | Insular Gyrus            | Dorsal Agranular Insula                  |
| INS_R_6_4  | R | Insula    | Insular Gyrus            | Ventral Dysgranular, Granular Insula     |
| INS_R_6_5  | R | Insula    | Insular Gyrus            | Dorsal Granular Insula                   |
| INS_R_6_6  | R | Insula    | Insular Gyrus            | Dorsal Dysgranular Insula                |
| IPL_L_6_2  | L | Parietal  | Inferior Parietal Lobule | Rostrodorsal Area 39                     |
| IPL_L_6_3  | L | Parietal  | Inferior Parietal Lobule | Rostrodorsal Area 40                     |
| IPL_L_6_4  | L | Parietal  | Inferior Parietal Lobule | Caudal Area 40                           |
| IPL_L_6_5  | L | Parietal  | Inferior Parietal Lobule | Rostroventral Area 39                    |
| IPL_L_6_6  | L | Parietal  | Inferior Parietal Lobule | Rostroventral Area 40                    |
| IPL_R_6_1  | R | Parietal  | Inferior Parietal Lobule | Caudal Area 39                           |
| IPL_R_6_2  | R | Parietal  | Inferior Parietal Lobule | Rostrodorsal Area 39                     |
| IPL_R_6_4  | R | Parietal  | Inferior Parietal Lobule | Caudal Area 40                           |
| IPL_R_6_5  | R | Parietal  | Inferior Parietal Lobule | Rostroventral Area 39                    |
| IPL_R_6_6  | R | Parietal  | Inferior Parietal Lobule | Rostroventral Area 40                    |
| ITG_L_7_2  | L | Temporal  | Inferior Temporal Gyrus  | Extreme Lateroventral Area 37            |
| ITG_L_7_5  | L | Temporal  | Inferior Temporal Gyrus  | Ventrolateral Area 37                    |
| ITG_R_7_2  | R | Temporal  | Inferior Temporal Gyrus  | Extreme Lateroventral Area 37            |
| ITG_R_7_5  | R | Temporal  | Inferior Temporal Gyrus  | Ventrolateral Area 37                    |
| LOcC_L_4_2 | L | Occipital | Lateral Occipital Cortex | Area V5/MT                               |
| LOcC_L_4_4 | L | Occipital | Lateral Occipital Cortex | Inferior Occipital Gyrus                 |
| LOcC_R_4_2 | R | Occipital | Lateral Occipital Cortex | Area V5/MT                               |
| LOcC_R_4_4 | R | Occipital | Lateral Occipital Cortex | Inferior Occipital Gyrus                 |
| MFG_L_7_2  | L | Frontal   | Middle Frontal Gyrus     | Inferior Frontal Junction                |
| MFG_L_7_3  | L | Frontal   | Middle Frontal Gyrus     | Area 46                                  |
| MFG_L_7_4  | L | Frontal   | Middle Frontal Gyrus     | Ventral Area 9/46                        |
| MFG_L_7_5  | L | Frontal   | Middle Frontal Gyrus     | Ventrolateral Area 8                     |
| MFG_L_7_6  | L | Frontal   | Middle Frontal Gyrus     | Ventrolateral Area 6                     |
| MFG_R_7_2  | R | Frontal   | Middle Frontal Gyrus     | Inferior Frontal Junction                |
| MFG_R_7_4  | R | Frontal   | Middle Frontal Gyrus     | Ventral Area 9/46                        |
| MFG_R_7_5  | R | Frontal   | Middle Frontal Gyrus     | Ventrolateral Area 8                     |
| MTG_L_4_3  | L | Temporal  | Middle Temporal Gyrus    | Dorsolateral Area 37                     |
| MTG_L_4_4  | L | Temporal  | Middle Temporal Gyrus    | Anterior Superior Temporal Sulcus        |
| MTG_R_4_3  | R | Temporal  | Middle Temporal Gyrus    | Dorsolateral Area 37                     |
| MTG_R_4_4  | R | Temporal  | Middle Temporal Gyrus    | Anterior Superior Temporal Sulcus        |
| OrG_L_6_1  | L | Frontal   | Orbital Gyrus            | Medial Area 14                           |
| OrG_L_6_2  | L | Frontal   | Orbital Gyrus            | Orbital Area 12/47                       |
| OrG_L_6_3  | L | Frontal   | Orbital Gyrus            | Lateral Area 11                          |
| OrG_L_6_5  | L | Frontal   | Orbital Gyrus            | Area 13                                  |
| OrG_L_6_6  | L | Frontal   | Orbital Gyrus            | Lateral Area 12/47                       |
| OrG_R_6_1  | R | Frontal   | Orbital Gyrus            | Medial Area 14                           |
| OrG_R_6_2  | R | Frontal   | Orbital Gyrus            | Orbital Area 12/47                       |
| OrG_R_6_5  | R | Frontal   | Orbital Gyrus            | Area 13                                  |
| OrG_R_6_6  | R | Frontal   | Orbital Gyrus            | Lateral Area 12/47                       |
| PCun_L_4_4 | L | Parietal  | Precuneus                | Area 31                                  |
| PCun_R_4_4 | R | Parietal  | Precuneus                | Area 31                                  |
| PhG_L_6_3  | L | Temporal  | Parahippocampal Gyrus    | Posterior Parahippocampal Gyrus          |
| PhG_L_6_5  | L | Temporal  | Parahippocampal Gyrus    | Area Ti                                  |
| PhG_L_6_6  | L | Temporal  | Parahippocampal Gyrus    | Area Th (Medial PPHC)                    |
| PhG_R_6_3  | R | Temporal  | Parahippocampal Gyrus    | Posterior Parahippocampal Gyrus          |
| PhG_R_6_6  | R | Temporal  | Parahippocampal Gyrus    | Area Th (Medial PPHC)                    |
| PoG_L_4_2  | L | Parietal  | Postcentral Gyrus        | Area 1/2/3(Tongue And Larynx)            |
| PoG_R_4_2  | R | Parietal  | Postcentral Gyrus        | Area 1/2/3(Tongue And Larynx)            |
| PrG_L_6_5  | L | Frontal   | Precentral Gyrus         | Area 4 (Tongue, Larynx)                  |
| PrG_L_6_6  | L | Frontal   | Precentral Gyrus         | Caudal Ventrolateral Area 6              |
| PrG_R_6_5  | R | Frontal   | Precentral Gyrus         | Area 4 (Tongue, Larynx)                  |
| PrG_R_6_6  | R | Frontal   | Precentral Gyrus         | Caudal Ventrolateral Area 6              |
| pSTS_L_2_1 | L | Temporal  | Superior Temporal Sulcus | Rostroposterior Superior Temporal Sulcus |

|           |            |          |                    |                          |                                          |
|-----------|------------|----------|--------------------|--------------------------|------------------------------------------|
|           | pSTS_L_2_2 | L        | Temporal           | Superior Temporal Sulcus | Caudoposterior Superior Temporal Sulcus  |
|           | pSTS_R_2_1 | R        | Temporal           | Superior Temporal Sulcus | Rostroposterior Superior Temporal Sulcus |
|           | pSTS_R_2_2 | R        | Temporal           | Superior Temporal Sulcus | Caudoposterior Superior Temporal Sulcus  |
|           | SFG_L_7_1  | L        | Frontal            | Superior Frontal Gyrus   | Medial Area 8                            |
|           | SFG_L_7_3  | L        | Frontal            | Superior Frontal Gyrus   | Lateral Area 9                           |
|           | SFG_L_7_5  | L        | Frontal            | Superior Frontal Gyrus   | Medial Area 6                            |
|           | SFG_L_7_6  | L        | Frontal            | Superior Frontal Gyrus   | Medial Area 9                            |
|           | SFG_L_7_7  | L        | Frontal            | Superior Frontal Gyrus   | A10M, Medial Area 10                     |
|           | SFG_R_7_1  | R        | Frontal            | Superior Frontal Gyrus   | Medial Area 8                            |
|           | SFG_R_7_6  | R        | Frontal            | Superior Frontal Gyrus   | Medial Area 9                            |
|           | SFG_R_7_7  | R        | Frontal            | Superior Frontal Gyrus   | A10M, Medial Area 10                     |
|           | SPL_L_5_3  | L        | Parietal           | Superior Parietal Lobule | Lateral Area 5                           |
|           | SPL_L_5_5  | L        | Parietal           | Superior Parietal Lobule | Intraparietal Area 7                     |
|           | SPL_R_5_5  | R        | Parietal           | Superior Parietal Lobule | Intraparietal Area 7                     |
|           | STG_L_6_2  | L        | Temporal           | Superior Temporal Gyrus  | Area 41/42                               |
|           | STG_L_6_3  | L        | Temporal           | Superior Temporal Gyrus  | Te                                       |
|           | STG_L_6_4  | L        | Temporal           | Superior Temporal Gyrus  | Caudal Area 22                           |
|           | STG_L_6_5  | L        | Temporal           | Superior Temporal Gyrus  | Lateral Area 38                          |
|           | STG_L_6_6  | L        | Temporal           | Superior Temporal Gyrus  | Rostral Area 22                          |
|           | STG_R_6_2  | R        | Temporal           | Superior Temporal Gyrus  | Area 41/42                               |
|           | STG_R_6_3  | R        | Temporal           | Superior Temporal Gyrus  | Te                                       |
|           | STG_R_6_4  | R        | Temporal           | Superior Temporal Gyrus  | Caudal Area 22                           |
|           | STG_R_6_5  | R        | Temporal           | Superior Temporal Gyrus  | Lateral Area 38                          |
|           | STG_R_6_6  | R        | Temporal           | Superior Temporal Gyrus  | Rostral Area 22                          |
|           | Tha_L_8_1  | L        | Subcortical Nuclei | Thalamus                 | Medial Prefrontal Thalamus               |
|           | Tha_L_8_2  | L        | Subcortical Nuclei | Thalamus                 | Premotor Thalamus                        |
|           | Tha_L_8_3  | L        | Subcortical Nuclei | Thalamus                 | Sensory Thalamus                         |
|           | Tha_L_8_4  | L        | Subcortical Nuclei | Thalamus                 | Rostral Temporal Thalamus                |
|           | Tha_L_8_5  | L        | Subcortical Nuclei | Thalamus                 | Posterior Parietal Thalamus              |
|           | Tha_L_8_6  | L        | Subcortical Nuclei | Thalamus                 | Occipital Thalamus                       |
|           | Tha_L_8_7  | L        | Subcortical Nuclei | Thalamus                 | Caudal Temporal Thalamus                 |
|           | Tha_L_8_8  | L        | Subcortical Nuclei | Thalamus                 | Lateral Prefrontal Thalamus              |
|           | Tha_R_8_1  | R        | Subcortical Nuclei | Thalamus                 | Medial Prefrontal Thalamus               |
|           | Tha_R_8_2  | R        | Subcortical Nuclei | Thalamus                 | Premotor Thalamus                        |
|           | Tha_R_8_3  | R        | Subcortical Nuclei | Thalamus                 | Sensory Thalamus                         |
|           | Tha_R_8_4  | R        | Subcortical Nuclei | Thalamus                 | Rostral Temporal Thalamus                |
|           | Tha_R_8_5  | R        | Subcortical Nuclei | Thalamus                 | Posterior Parietal Thalamus              |
|           | Tha_R_8_6  | R        | Subcortical Nuclei | Thalamus                 | Occipital Thalamus                       |
|           | Tha_R_8_7  | R        | Subcortical Nuclei | Thalamus                 | Caudal Temporal Thalamus                 |
|           | Tha_R_8_8  | R        | Subcortical Nuclei | Thalamus                 | Lateral Prefrontal Thalamus              |
| Language  | Amyg_L_2_1 | L        | Subcortical Nuclei | Amygdala                 | Medial Amygdala                          |
|           | Amyg_L_2_2 | L        | Subcortical Nuclei | Amygdala                 | Lateral Amygdala                         |
|           | Amyg_R_2_2 | R        | Subcortical Nuclei | Amygdala                 | Lateral Amygdala                         |
|           | BG_L_6_1   | L        | Subcortical Nuclei | Basal Ganglia            | Ventral Caudate                          |
|           | BG_L_6_2   | L        | Subcortical Nuclei | Basal Ganglia            | Globus Pallidus                          |
|           | BG_L_6_4   | L        | Subcortical Nuclei | Basal Ganglia            | Ventromedial Putamen                     |
|           | BG_L_6_5   | L        | Subcortical Nuclei | Basal Ganglia            | Dorsal Caudate                           |
|           | BG_L_6_6   | L        | Subcortical Nuclei | Basal Ganglia            | Dorsolateral Putamen                     |
|           | BG_R_6_1   | R        | Subcortical Nuclei | Basal Ganglia            | Ventral Caudate                          |
|           | BG_R_6_2   | R        | Subcortical Nuclei | Basal Ganglia            | Globus Pallidus                          |
|           | BG_R_6_4   | R        | Subcortical Nuclei | Basal Ganglia            | Ventromedial Putamen                     |
|           | BG_R_6_5   | R        | Subcortical Nuclei | Basal Ganglia            | Dorsal Caudate                           |
|           | CG_L_7_1   | L        | Cingulate          | Cingulate Gyrus          | Dorsal Area 23                           |
|           | CG_L_7_5   | L        | Cingulate          | Cingulate Gyrus          | Caudodorsal Area 24                      |
|           | CG_R_7_1   | R        | Cingulate          | Cingulate Gyrus          | Dorsal Area 23                           |
|           | CG_R_7_3   | R        | Cingulate          | Cingulate Gyrus          | Pregenual Area 32                        |
|           | CG_R_7_5   | R        | Cingulate          | Cingulate Gyrus          | Caudodorsal Area 24                      |
| FuG_L_3_2 | L          | Temporal | Fusiform Gyrus     | Medioventral Area37      |                                          |

|             |   |           |                          |                                   |
|-------------|---|-----------|--------------------------|-----------------------------------|
| FuG_L_3_3   | L | Temporal  | Fusiform Gyrus           | Lateroventral Area37              |
| FuG_R_3_2   | R | Temporal  | Fusiform Gyrus           | Medioventral Area37               |
| FuG_R_3_3   | R | Temporal  | Fusiform Gyrus           | Lateroventral Area37              |
| IFG_L_6_1   | L | Frontal   | Inferior Frontal Gyrus   | Dorsal Area 44                    |
| IFG_L_6_2   | L | Frontal   | Inferior Frontal Gyrus   | Inferior Frontal Sulcus           |
| IFG_L_6_3   | L | Frontal   | Inferior Frontal Gyrus   | Caudal Area 45                    |
| IFG_L_6_4   | L | Frontal   | Inferior Frontal Gyrus   | Rostral Area 45                   |
| IFG_L_6_5   | L | Frontal   | Inferior Frontal Gyrus   | Opercular Area 44                 |
| IFG_L_6_6   | L | Frontal   | Inferior Frontal Gyrus   | Ventral Area 44                   |
| IFG_R_6_1   | R | Frontal   | Inferior Frontal Gyrus   | Dorsal Area 44                    |
| IFG_R_6_2   | R | Frontal   | Inferior Frontal Gyrus   | Inferior Frontal Sulcus           |
| IFG_R_6_3   | R | Frontal   | Inferior Frontal Gyrus   | Caudal Area 45                    |
| IFG_R_6_4   | R | Frontal   | Inferior Frontal Gyrus   | Rostral Area 45                   |
| IFG_R_6_5   | R | Frontal   | Inferior Frontal Gyrus   | Opercular Area 44                 |
| IFG_R_6_6   | R | Frontal   | Inferior Frontal Gyrus   | Ventral Area 44                   |
| INS_L_6_1   | L | Insula    | Insular Gyrus            | Hypergranular Insula              |
| INS_L_6_2   | L | Insula    | Insular Gyrus            | Ventral Agranular Insula          |
| INS_L_6_3   | L | Insula    | Insular Gyrus            | Dorsal Agranular Insula           |
| INS_L_6_6   | L | Insula    | Insular Gyrus            | Dorsal Dysgranular Insula         |
| INS_R_6_2   | R | Insula    | Insular Gyrus            | Ventral Agranular Insula          |
| INS_R_6_3   | R | Insula    | Insular Gyrus            | Dorsal Agranular Insula           |
| INS_R_6_6   | R | Insula    | Insular Gyrus            | Dorsal Dysgranular Insula         |
| IPL_L_6_2   | L | Parietal  | Inferior Parietal Lobule | Rostrodorsal Area 39              |
| IPL_L_6_3   | L | Parietal  | Inferior Parietal Lobule | Rostrodorsal Area 40              |
| IPL_L_6_4   | L | Parietal  | Inferior Parietal Lobule | Caudal Area 40                    |
| IPL_L_6_5   | L | Parietal  | Inferior Parietal Lobule | Rostroventral Area 39             |
| IPL_L_6_6   | L | Parietal  | Inferior Parietal Lobule | Rostroventral Area 40             |
| IPL_R_6_2   | R | Parietal  | Inferior Parietal Lobule | Rostrodorsal Area 39              |
| IPL_R_6_3   | R | Parietal  | Inferior Parietal Lobule | Rostrodorsal Area 40              |
| IPL_R_6_4   | R | Parietal  | Inferior Parietal Lobule | Caudal Area 40                    |
| IPL_R_6_5   | R | Parietal  | Inferior Parietal Lobule | Rostroventral Area 39             |
| ITG_L_7_2   | L | Temporal  | Inferior Temporal Gyrus  | Extreme Lateroventral Area 37     |
| ITG_L_7_5   | L | Temporal  | Inferior Temporal Gyrus  | Ventrolateral Area 37             |
| ITG_L_7_6   | L | Temporal  | Inferior Temporal Gyrus  | Caudolateral of Area 20           |
| ITG_R_7_5   | R | Temporal  | Inferior Temporal Gyrus  | Ventrolateral Area 37             |
| LOcC_L_2_2  | L | Occipital | Lateral Occipital Cortex | Lateral Superior Occipital Gyrus  |
| LOcC_L_4_1  | L | Occipital | Lateral Occipital Cortex | Middle Occipital Gyrus            |
| LOcC_L_4_2  | L | Occipital | Lateral Occipital Cortex | Area V5/MT                        |
| LOcC_L_4_3  | L | Occipital | Lateral Occipital Cortex | Occipital Polar Cortex            |
| LOcC_L_4_4  | L | Occipital | Lateral Occipital Cortex | Inferior Occipital Gyrus          |
| LOcC_R_4_1  | R | Occipital | Lateral Occipital Cortex | Middle Occipital Gyrus            |
| LOcC_R_4_2  | R | Occipital | Lateral Occipital Cortex | Area V5/MT                        |
| LOcC_R_4_3  | R | Occipital | Lateral Occipital Cortex | Occipital Polar Cortex            |
| LOcC_R_4_4  | R | Occipital | Lateral Occipital Cortex | Inferior Occipital Gyrus          |
| MFG_L_7_2   | L | Frontal   | Middle Frontal Gyrus     | Inferior Frontal Junction         |
| MFG_L_7_4   | L | Frontal   | Middle Frontal Gyrus     | Ventral Area 9/46                 |
| MFG_L_7_6   | L | Frontal   | Middle Frontal Gyrus     | Ventrolateral Area 6              |
| MFG_R_7_2   | R | Frontal   | Middle Frontal Gyrus     | Inferior Frontal Junction         |
| MFG_R_7_4   | R | Frontal   | Middle Frontal Gyrus     | Ventral Area 9/46                 |
| MFG_R_7_5   | R | Frontal   | Middle Frontal Gyrus     | Ventrolateral Area 8              |
| MFG_R_7_6   | R | Frontal   | Middle Frontal Gyrus     | Ventrolateral Area 6              |
| MTG_L_4_1   | L | Temporal  | Middle Temporal Gyrus    | Caudal Area 21                    |
| MTG_L_4_2   | L | Temporal  | Middle Temporal Gyrus    | Rostral Area 21                   |
| MTG_L_4_3   | L | Temporal  | Middle Temporal Gyrus    | Dorsolateral Area 37              |
| MTG_L_4_4   | L | Temporal  | Middle Temporal Gyrus    | Anterior Superior Temporal Sulcus |
| MTG_R_4_3   | R | Temporal  | Middle Temporal Gyrus    | Dorsolateral Area 37              |
| MTG_R_4_4   | R | Temporal  | Middle Temporal Gyrus    | Anterior Superior Temporal Sulcus |
| MVOcC_L_5_3 | L | Occipital | Ventral Occipital Cortex | Caudal Cuneus Gyrus               |

|             |   |                    |                          |                                          |
|-------------|---|--------------------|--------------------------|------------------------------------------|
| MVOcC_R_5_1 | R | Occipital          | Ventral Occipital Cortex | Caudal Lingual Gyrus                     |
| MVOcC_R_5_2 | R | Occipital          | Ventral Occipital Cortex | Rostral Cuneus Gyrus                     |
| MVOcC_R_5_3 | R | Occipital          | Ventral Occipital Cortex | Caudal Cuneus Gyrus                      |
| OrG_L_6_2   | L | Frontal            | Orbital Gyrus            | Orbital Area 12/47                       |
| OrG_L_6_6   | L | Frontal            | Orbital Gyrus            | Lateral Area 12/47                       |
| OrG_R_6_2   | R | Frontal            | Orbital Gyrus            | Orbital Area 12/47                       |
| OrG_R_6_6   | R | Frontal            | Orbital Gyrus            | Lateral Area 12/47                       |
| PCun_L_4_1  | L | Parietal           | Precuneus                | Medial Area 7                            |
| PCun_L_4_4  | L | Parietal           | Precuneus                | Area 31                                  |
| PCun_R_4_4  | R | Parietal           | Precuneus                | Area 31                                  |
| PhG_L_6_3   | L | Temporal           | Parahippocampal Gyrus    | Posterior Parahippocampal Gyrus          |
| PoG_L_4_1   | L | Parietal           | Postcentral Gyrus        | Area 1/2/3 (Upper Limb, Head, Face)      |
| PoG_L_4_2   | L | Parietal           | Postcentral Gyrus        | Area 1/2/3(Tongue And Larynx)            |
| PoG_L_4_3   | L | Parietal           | Postcentral Gyrus        | Area 2                                   |
| PoG_R_4_2   | R | Parietal           | Postcentral Gyrus        | Area 1/2/3(Tongue And Larynx)            |
| PrG_L_6_1   | L | Frontal            | Precentral Gyrus         | Area 4 (Head, Face)                      |
| PrG_L_6_2   | L | Frontal            | Precentral Gyrus         | Caudal Dorsolateral Area 6               |
| PrG_L_6_5   | L | Frontal            | Precentral Gyrus         | Area 4 (Tongue, Larynx)                  |
| PrG_L_6_6   | L | Frontal            | Precentral Gyrus         | Caudal Ventrolateral Area 6              |
| PrG_R_6_1   | R | Frontal            | Precentral Gyrus         | Area 4 (Head, Face)                      |
| PrG_R_6_2   | R | Frontal            | Precentral Gyrus         | Caudal Dorsolateral Area 6               |
| PrG_R_6_5   | R | Frontal            | Precentral Gyrus         | Area 4 (Tongue, Larynx)                  |
| PrG_R_6_6   | R | Frontal            | Precentral Gyrus         | Caudal Ventrolateral Area 6              |
| pSTS_L_2_1  | L | Temporal           | Superior Temporal Sulcus | Rostroposterior Superior Temporal Sulcus |
| pSTS_L_2_2  | L | Temporal           | Superior Temporal Sulcus | Caudoposterior Superior Temporal Sulcus  |
| pSTS_R_2_1  | R | Temporal           | Superior Temporal Sulcus | Rostroposterior Superior Temporal Sulcus |
| pSTS_R_2_2  | R | Temporal           | Superior Temporal Sulcus | Caudoposterior Superior Temporal Sulcus  |
| SFG_L_7_1   | L | Frontal            | Superior Frontal Gyrus   | Medial Area 8                            |
| SFG_L_7_3   | L | Frontal            | Superior Frontal Gyrus   | Lateral Area 9                           |
| SFG_L_7_4   | L | Frontal            | Superior Frontal Gyrus   | Dorsolateral Area 6                      |
| SFG_L_7_5   | L | Frontal            | Superior Frontal Gyrus   | Medial Area 6                            |
| SFG_L_7_6   | L | Frontal            | Superior Frontal Gyrus   | Medial Area 9                            |
| SFG_R_7_1   | R | Frontal            | Superior Frontal Gyrus   | Medial Area 8                            |
| SFG_R_7_5   | R | Frontal            | Superior Frontal Gyrus   | Medial Area 6                            |
| SFG_R_7_6   | R | Frontal            | Superior Frontal Gyrus   | Medial Area 9                            |
| SPL_L_5_2   | L | Parietal           | Superior Parietal Lobule | Caudal Area 7                            |
| SPL_L_5_3   | L | Parietal           | Superior Parietal Lobule | Lateral Area 5                           |
| SPL_L_5_5   | L | Parietal           | Superior Parietal Lobule | Intraparietal Area 7                     |
| SPL_R_5_3   | R | Parietal           | Superior Parietal Lobule | Lateral Area 5                           |
| SPL_R_5_5   | R | Parietal           | Superior Parietal Lobule | Intraparietal Area 7                     |
| STG_L_6_2   | L | Temporal           | Superior Temporal Gyrus  | Area 41/42                               |
| STG_L_6_3   | L | Temporal           | Superior Temporal Gyrus  | Te                                       |
| STG_L_6_4   | L | Temporal           | Superior Temporal Gyrus  | Caudal Area 22                           |
| STG_L_6_5   | L | Temporal           | Superior Temporal Gyrus  | Lateral Area 38                          |
| STG_L_6_6   | L | Temporal           | Superior Temporal Gyrus  | Rostral Area 22                          |
| STG_R_6_2   | R | Temporal           | Superior Temporal Gyrus  | Area 41/42                               |
| STG_R_6_3   | R | Temporal           | Superior Temporal Gyrus  | Te                                       |
| STG_R_6_4   | R | Temporal           | Superior Temporal Gyrus  | Caudal Area 22                           |
| STG_R_6_5   | R | Temporal           | Superior Temporal Gyrus  | Lateral Area 38                          |
| STG_R_6_6   | R | Temporal           | Superior Temporal Gyrus  | Rostral Area 22                          |
| Tha_L_8_1   | L | Subcortical Nuclei | Thalamus                 | Medial Prefrontal Thalamus               |
| Tha_L_8_2   | L | Subcortical Nuclei | Thalamus                 | Premotor Thalamus                        |
| Tha_L_8_3   | L | Subcortical Nuclei | Thalamus                 | Sensory Thalamus                         |
| Tha_L_8_4   | L | Subcortical Nuclei | Thalamus                 | Rostral Temporal Thalamus                |
| Tha_L_8_5   | L | Subcortical Nuclei | Thalamus                 | Posterior Parietal Thalamus              |
| Tha_L_8_6   | L | Subcortical Nuclei | Thalamus                 | Occipital Thalamus                       |
| Tha_L_8_7   | L | Subcortical Nuclei | Thalamus                 | Caudal Temporal Thalamus                 |
| Tha_L_8_8   | L | Subcortical Nuclei | Thalamus                 | Lateral Prefrontal Thalamus              |

|  |           |   |                    |          |                             |
|--|-----------|---|--------------------|----------|-----------------------------|
|  | Tha_R_8_1 | R | Subcortical Nuclei | Thalamus | Medial Prefrontal Thalamus  |
|  | Tha_R_8_2 | R | Subcortical Nuclei | Thalamus | Premotor Thalamus           |
|  | Tha_R_8_3 | R | Subcortical Nuclei | Thalamus | Sensory Thalamus            |
|  | Tha_R_8_4 | R | Subcortical Nuclei | Thalamus | Rostral Temporal Thalamus   |
|  | Tha_R_8_5 | R | Subcortical Nuclei | Thalamus | Posterior Parietal Thalamus |
|  | Tha_R_8_7 | R | Subcortical Nuclei | Thalamus | Caudal Temporal Thalamus    |
|  | Tha_R_8_8 | R | Subcortical Nuclei | Thalamus | Lateral Prefrontal Thalamus |



**Supplemental Table S3:** Hyperparameters optimized during randomized search for each model. All optimizations were implemented with *RandomizedSearchCV* within *SciKit-Learn*. All distributions were generated using *SciPy* and all continuous values included were greater than zero.

| Algorithm                 | <i>SciKit-Learn</i> Package | Hyperparameter     | Sampling Distribution                                     |
|---------------------------|-----------------------------|--------------------|-----------------------------------------------------------|
| Gradient Boosting Machine | GradientBoostingRegressor   | learning_rate      | Gaussian (loc=0.0, scale=0.1)                             |
|                           |                             | n_estimators       | Gaussian (loc=500, scale=300; rounded to nearest integer) |
|                           |                             | max_features       | Gaussian (loc=62, scale=62; rounded to nearest integer)   |
|                           |                             | subsample          | Gaussian (loc=1.0, scale=0.25)                            |
|                           |                             | criterion          | {'friedman_mse', 'mse'}                                   |
|                           |                             | max_depth          | Gaussian (loc=2.5, scale=2.5; rounded to nearest integer) |
| Ridge Regression          | SDGRegressor                | learning_rate      | {'optimal', 'invscaling', 'adaptive'}                     |
|                           |                             | alpha              | Gaussian (loc=0.0, scale=0.1)                             |
|                           |                             | tol                | Gaussian (loc=0.001, scale=0.1)                           |
|                           |                             | power_t            | Gaussian (loc=0.5, scale=0.1)                             |
|                           |                             | eta0               | Gaussian (loc=0.0, scale=0.1)                             |
| Multilayer Perceptron     | MLPRegressor                | learning_rate_init | Gaussian (loc=0.0, scale=0.1)                             |
|                           |                             | alpha              | Gaussian (loc=0.0, scale=0.1)                             |
|                           |                             | tol                | Gaussian (loc=0.001, scale=0.1)                           |
|                           |                             | power_t            | Gaussian (loc=0.5, scale=0.1)                             |
|                           |                             | solvers            | {'lbfgs', 'adam'}                                         |
| Support Vector Machine    | SVR                         | C                  | Gaussian (loc=0.0, scale=1.0)                             |
|                           |                             | tol                | Gaussian (loc=0.0, scale=0.1)                             |
|                           |                             | degree             | {'1', '2', '3', '4', '5'}                                 |
|                           |                             | kernel             | {'poly', 'rbf'}                                           |
|                           |                             | gamma              | Gaussian (loc=0.0, scale=1.0)                             |
|                           |                             | coef0              | Gaussian (loc=0.0, scale=5.0)                             |
|                           |                             | epsilon            | Gaussian (loc=0.0, scale=0.5)                             |
| Random Forest             | RandomForestRegressor       | n_estimators       | Gaussian (loc=500, scale=300; rounded to nearest integer) |
|                           |                             | max_features       | Gaussian (loc=62, scale=62; rounded to nearest integer)   |

**Supplemental Table S4.** Model algorithm performances on the evaluation set of typically-developing girls. Above-chance performance is calculated by subtracting the optimized performance and average performance when predicting randomized label vectors. Coefficients and  $p$ -values correspond to results from Pearson correlation tests between predicted age and chronological age.

| Neural Feature Set | Algorithm                 | Mean Absolute Error (years) | Above-Chance Performance (years) | Pearson Coefficient ( $r$ ) | $P$     |
|--------------------|---------------------------|-----------------------------|----------------------------------|-----------------------------|---------|
| Whole-Brain        | Super Learner             | 1.666                       | 1.003                            | 0.677                       | < 0.001 |
|                    | Random Forest             | 1.812                       | 0.272                            | 0.434                       | 0.030   |
|                    | Support Vector Machine    | 2.277                       | 0.865                            | 0.658                       | < 0.001 |
|                    | Ridge Regression          | 2.484                       | 0.972                            | 0.657                       | < 0.001 |
|                    | Gradient Boosting Machine | 1.824                       | 0.560                            | 0.520                       | 0.008   |
|                    | Multilayer Perceptron     | 3.914                       | 0.162                            | 0.264                       | 0.202   |
| Emotion Circuitry  | Super Learner             | 1.602                       | 0.632                            | 0.663                       | < 0.001 |
|                    | Random Forest             | 1.658                       | 0.403                            | 0.539                       | 0.005   |
|                    | Support Vector Machine    | 1.848                       | 0.529                            | 0.584                       | 0.002   |
|                    | Ridge Regression          | 2.036                       | 0.976                            | 0.660                       | < 0.001 |
|                    | Gradient Boosting Machine | 1.613                       | 0.517                            | 0.549                       | 0.005   |
|                    | Multilayer Perceptron     | 2.099                       | 1.034                            | 0.638                       | < 0.001 |
| Language Circuitry | Super Learner             | 1.569                       | 1.110                            | 0.655                       | < 0.001 |
|                    | Random Forest             | 1.747                       | 0.340                            | 0.486                       | 0.014   |
|                    | Support Vector Machine    | 2.300                       | 0.996                            | 0.663                       | < 0.001 |
|                    | Ridge Regression          | 2.327                       | 0.975                            | 0.656                       | < 0.001 |
|                    | Gradient Boosting Machine | 1.841                       | 0.763                            | 0.585                       | 0.002   |
|                    | Multilayer Perceptron     | 3.416                       | 0.394                            | 0.441                       | 0.027   |

SUPPLEMENTAL FIGURES AND LEGENDS

A

“Emotion” NeuroSynth Mask

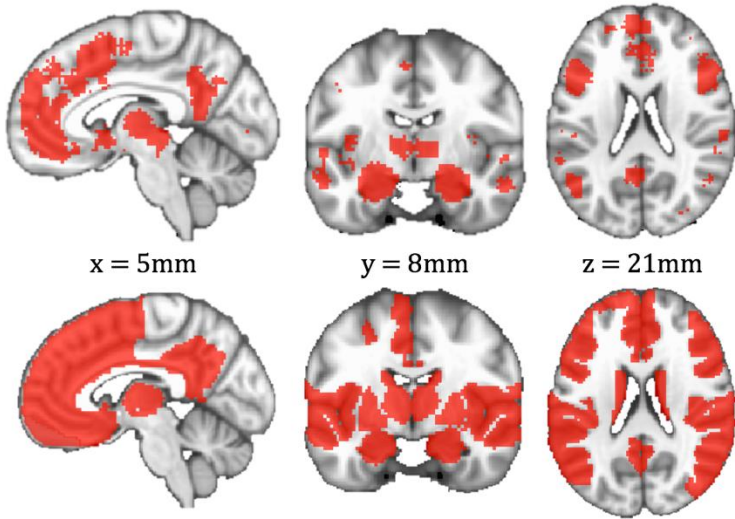

“Emotion” Brainnetome + AAL2 Mask

B

“Language” NeuroSynth Mask

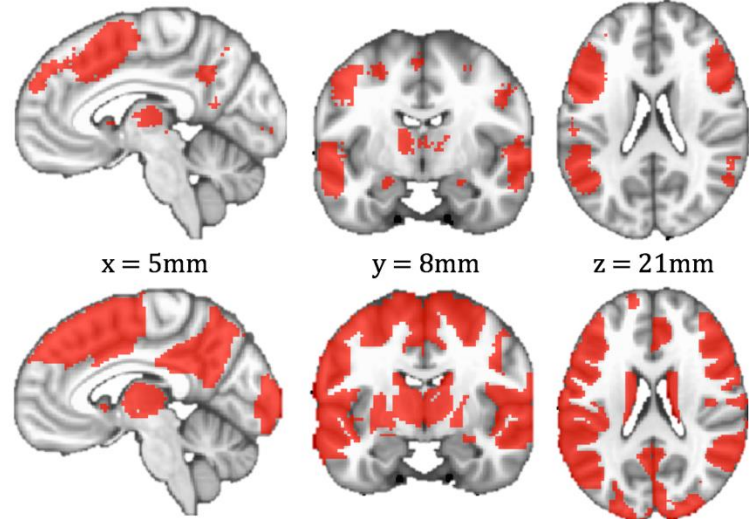

“Language” Brainnetome + AAL2 Mask

**Supplemental Figure S1.** Masks taken from the NeuroSynth neuroimaging meta-analysis database using the terms (A) “emotion” and (B) “language”. The uniformity test was used to err on the side of voxel inclusion. Below each NeuroSynth mask is the corresponding mask of the cortical/subcortical and cerebellar ROIs from the Brainnetome and AAL2 atlases respectively. Values for x, y, and z refer to slices in the volume. ROI = region of interest; AAL = automated anatomical labelling.

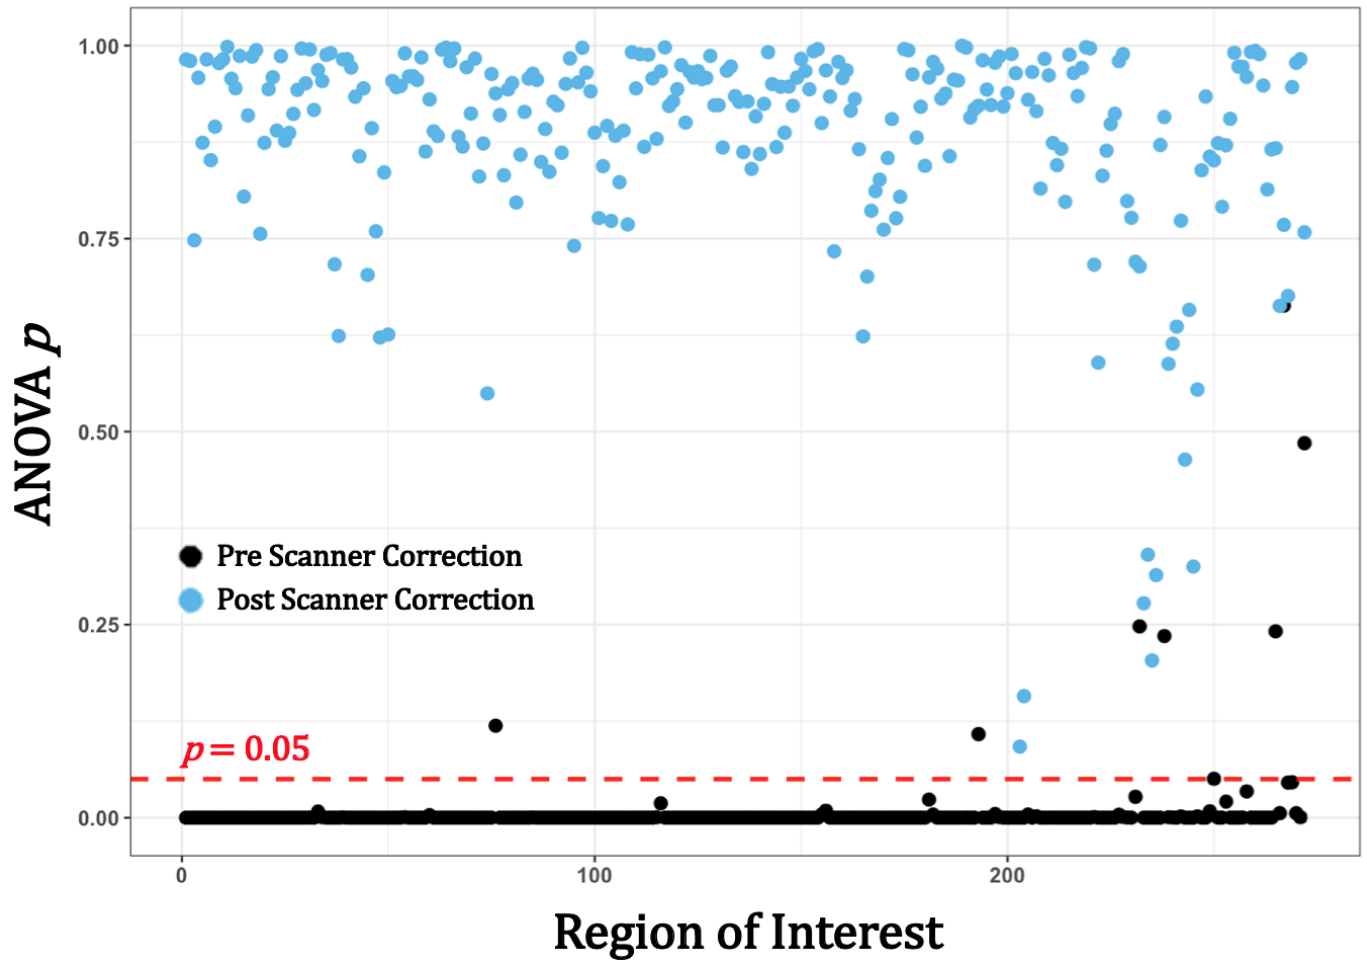

**Supplemental Figure S2.** The results of batch correction across GMV estimates through *Combat*. For each GMV region of interest, the  $p$ -value associated with the  $F$ -statistic from a one-way analysis of variance (low  $p$ 's indicate at least one significant difference in average GMV across MR scanners). GMV = gray matter volume; MR = magnetic resonance

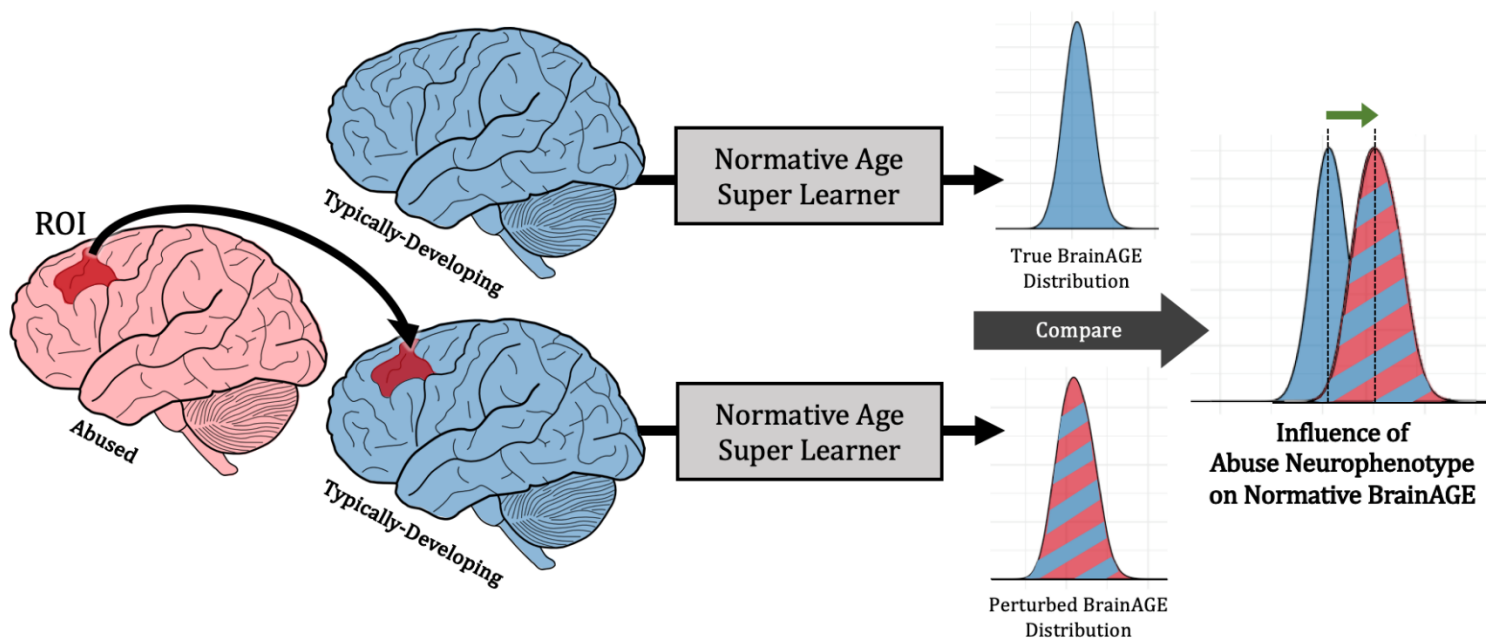

**Supplemental Figure S3.** Simplified schematic of the perturbation sensitivity algorithm used to determine feature influence on BrainAGE distributions. The algorithm was run for each ROI including 1000 simulations. First, the true distribution of BrainAGEs was calculated using the true, non-perturbed feature set (only occurred on the first simulation). Next, an abuse-perturbed feature set was created by generating a random bootstrap sample of each abuse-related ROI (Resilient and Susceptible). The abuse-related bootstrap replaces the existing ROI in the TD feature set and BrainAGEs are recalculated. Median perturbed BrainAGE was calculated across simulations for each participant. Two-sample Wilcoxon Tests were used to compare the abuse-perturbed BrainAGE distribution to the true and TD-perturbed BrainAGE distributions. If distributions were significantly different after false discovery rate correction ( $FDR-p < 0.05$ ), that abuse feature was considered significantly influential to BrainAGE. ROI= region-of-interest; BrainAGE = brain age gap estimate; TD = typically-developing

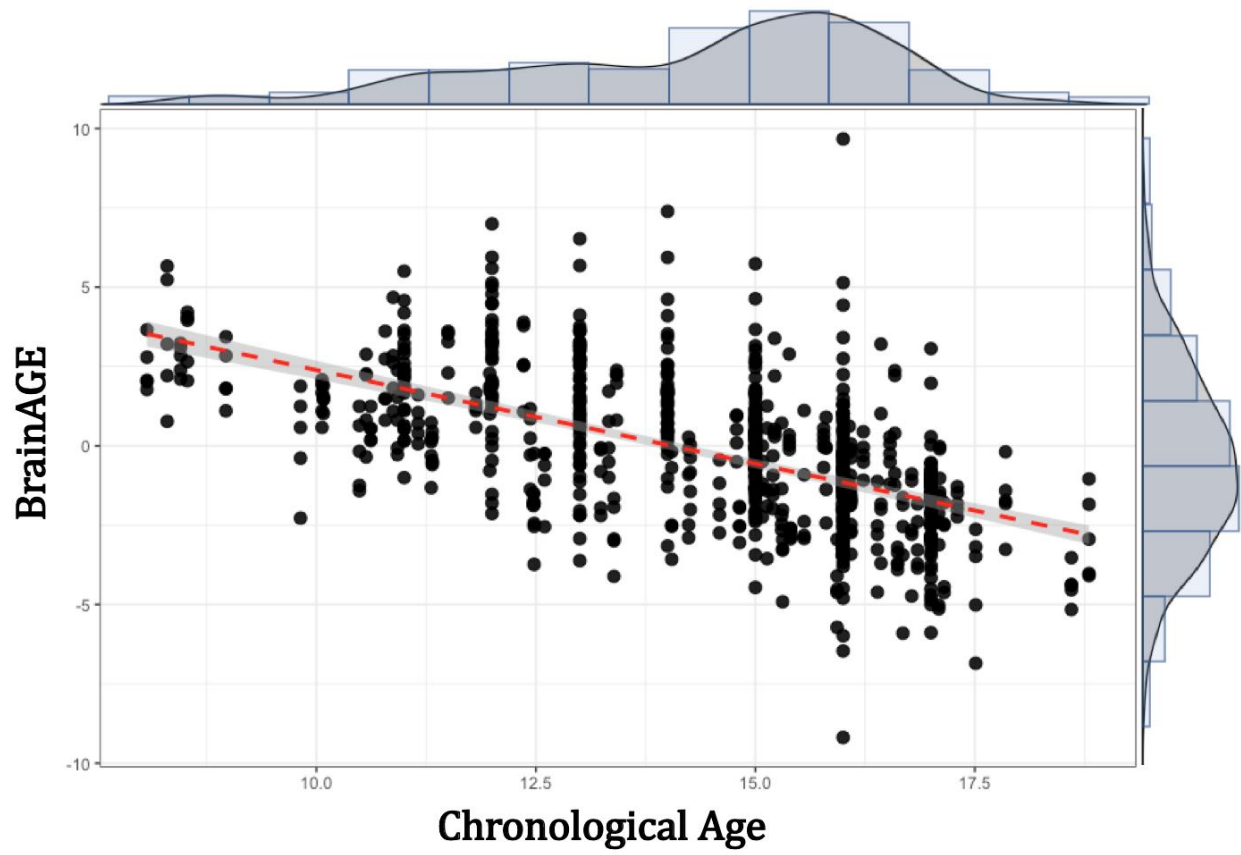

**Supplemental Figure S4.** Label bias observed across circuits when predicting chronological age.

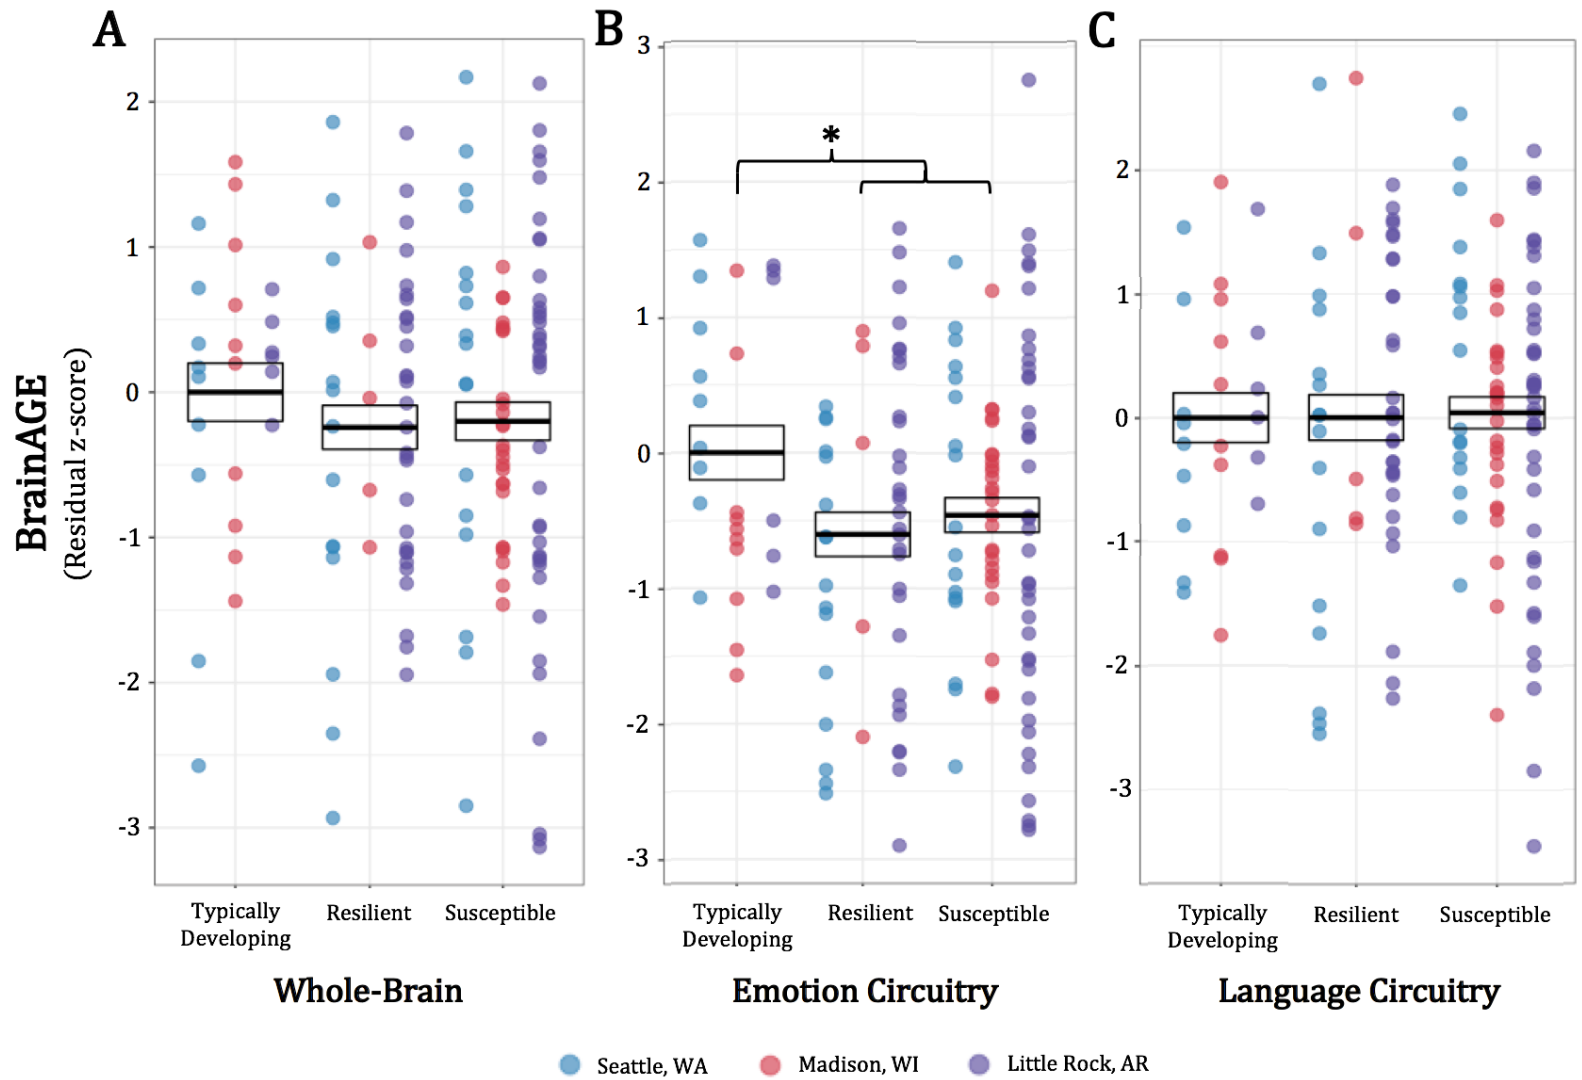

**Supplemental Figure S5.** Abuse- and internalizing diagnosis-related associations with BrainAGE for whole-brain, emotion circuit, and language circuit feature sets. Colors indicate the MR scanner that each BrainAGE originated from. BrainAGEs are represented as residualized  $z$ -scores relative to TD girls, controlling for label (chronological age), MR scanner, IQ, and physical neglect. **(A)** For the whole-brain analysis, there were no significant differences in BrainAGE across groups. **(B)** For the emotion circuit analysis, an abuse main effect shows that Resilient and Susceptible girls show significantly reduced average BrainAGE relative to TD girls. **(C)** For the language circuit analysis, there were no significant differences in BrainAGE across groups. BrainAGE = brain age gap estimate; TD = typically-developing; \* $p < 0.017$  (after adjustment for experiment-wide Bonferroni correction).

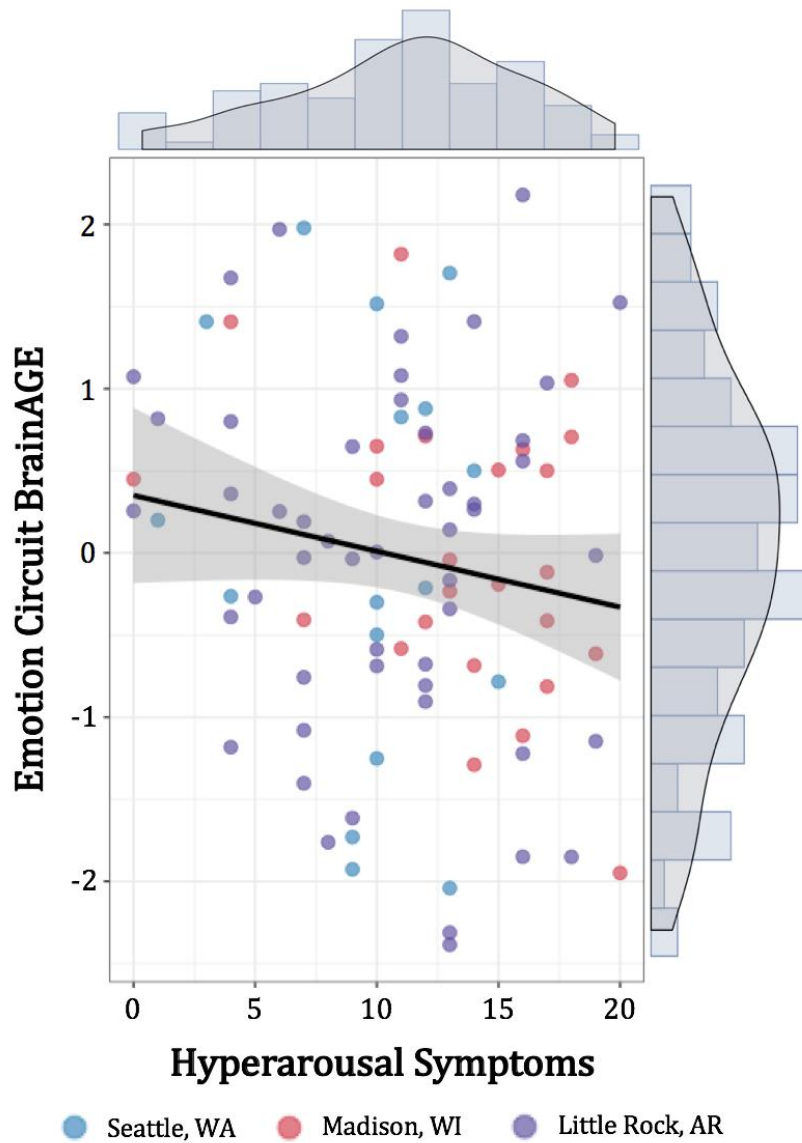

**Supplemental Figure S6.** Symptom-level association with emotion circuit BrainAGEs across abused girls. Colors indicate the MR scanner that each BrainAGE originated from. Graphed results control for label (chronological age), IQ, MR scanner, physical neglect, and abuse load. Emotion circuitry BrainAGEs were negatively associated with hyperarousal symptoms (PTSD-RI subscore D). BrainAGE = brain age gap estimate; PTSD-RI = Post-Traumatic Stress Disorder Reaction Index.
